# Supplementary material for: Circulating cytokines and small molecules follow distinct expression patterns in acute myeloid leukaemia
Source: PubMed Central journal article supplement — Br J Cancer. 2017 Sep 12;117(10):1551–6. doi: 10.1038/bjc.2017.316 (PMC5680464; doi:10.1038/bjc.2017.316), 2017-09-12
Supplement: bjc2017316x1.pdf [file bjc2017316x1.pdf]

Supplemental File

**Circulating cytokines and small molecules follow distinct expression patterns in acute myeloid leukemia**

Islam, M et al.

**Contents:**

**Materials and Methods**

**Supplemental Tables**

**References**

**Supplemental Figures**

## **Materials and Methods**

### **Study population**

Acute myeloid leukemia (AML) patients were selected based on newly diagnosed cases, no previous cancer history, and chemotherapeutic treatments have not been received yet. Control subjects were ensured to be free from any type of fever for at least 1 week before testing, have not taken any medications, were not pregnant, and presented no known chronic or acute diseases. Additional information of the patients is shown in Supplemental Table S1. A total of 2-ml peripheral blood samples were collected in plasma separating (purple top) tubes from 38 individuals (19 AML cases and 19 healthy controls) and fresh plasma was separated by centrifuging at 2000 rpm for 10 min. Plasma was aliquoted and frozen at -80<sup>0</sup> C until use. Cytogenetic studies were performed as a routine diagnostic test for all AML patients in Cytogenetics Laboratory, Hematology Unit, Institute for Medical Research, Kuala Lumpur. All the patients provided written informed consent. All experimental protocols and medical ethics were approved by the Medical Ethics Committee of Institute for Medical Research, Malaysia (NMRR-16-1384-31900 S1 R0).

### **Circulating cytokines and small molecules (analytes) selection**

We searched available peer-reviewed literature that reported human circulating cancer biomarkers and curated a list of biomarkers in different cancers, including AML. We selected 22 analytes that been reported in AML patients by different research groups. Then, we selected another 10 analytes that have been previously reported in some other cancers but not in AML. A total of 32 analytes were selected for this study to profile from plasma samples (Table S2).

### **Analytes profiling**

To measure the concentration of the analyte in plasma, the multiplex analysis was performed using the Luminex 200™ on a Bioplex (Bio-Rad) cytometer which enabled simultaneous detection and quantification of multiple analytes per sample. One antibody specific for a single plasma analyte is bound to magnetic beads with distinctive fluorescence. All the antibodies were mixed together and used for each sample. The magnetic beads used for this study were supplied by EMD Millipore. Technical details and procedures are given at MILIPLEX MAP Human Circulating Cancer Biomarker Magnetic Bead Panel section ([www.emdmillipore.com](http://www.emdmillipore.com)).

Patient plasma was diluted and mixed with magnetic beads. Two 96-well Plates were incubated overnight at 4° C with shaking (500 rpm), washed 3 times with wash buffer and incubated for 1 hour with detection antibodies. Streptavidin-phycoerythrin was then added and incubated for 30 min, washed 3 times and sheath fluid was added for 5 min then read using calibrated Luminex 200™ system on a Bioplex (Bio-Rad) cytometer. After measurement of fluorescence intensity by Bioplex cytometer, a digital processor captured the raw data and Bioplex Manager (Version 6.1) was used to analyze the data. Each 96-well plate contained negative controls (duplicate) that were used as background intensity. All the samples, quality controls, and standards were run in duplicates. In order to draw a standard curve, 7-wells (duplicate) of consecutive 3-fold dilution of known standards were used to fit a 6-parameter logistic curve for each analytes. The intensity of the magnetic beads was compared to the corresponding fitted curve to measure the concentration of the proteins in each duplicate sample and mean concentration was calculated from the duplicate. If the intensities of the samples were beyond the standard curve range, the values were considered as out-of-range above (OOR>) or out-of-range below (OOR<) and the values were excluded. Some analytes (IL-6, IL-8, bHCG, TGF $\alpha$ , and VEGF) were OOR< in some of the healthy controls.

### **Data analysis and visualization**

We used R platform (<http://www.r-project.org/>, version 3.1.3) for data analysis and visualization. In order to measure differential expression between AML and control, Mann-Whitney U-test was performed and a significant threshold was set up ( $p < 0.005$ ) for this study. Power analysis was performed for the sample size and the probability of getting significant deregulation (Table S5). Median fold changes were calculated by dividing healthy controls median expression. Distribution of the analytes across the AML patients was visualized using the R package OncoPrint. Pearson correlation test was performed for determining correlation coefficients and the ggplot2 package was used for visualization of the correlation coefficients. For multivariate analysis and low dimensional representation of the dataset, we applied principal component analysis (PCA). The BimodalIndex package <sup>1</sup> was used for determining bimodal distribution patterns of the analytes and 18 of them were selected as significantly informative ( $BI > 1.4$ ) for clustering. The packages gplots and beeswarm were used for the generation of heatmaps and beeswarm plots, respectively.

To validate the deregulation of analytes, and additional exploratory analysis was performed using The Cancer Genome Atlas (TCGA) data<sup>2</sup>. Promoter methylation and gene expression of the corresponding genes were analyzed using RnBeads package (<http://rnbeads.mpi-inf.mpg.de/>) and custom R scripts<sup>3</sup>.

## Supplemental Tables

**Table S1: Demographics of the samples.**

| Case ID | Age | Gender | Race    | Karyotype | Control ID | Age | Gender | Race    |
|---------|-----|--------|---------|-----------|------------|-----|--------|---------|
| S1      | 53  | M      | Malay   | Tri-11    | C1         | 60  | M      | Malay   |
| S2      | 46  | F      | Malay   | Normal    | C2         | 36  | M      | Chinese |
| S3      | 61  | M      | Malay   | Normal    | C3         | 54  | M      | Chinese |
| S4      | 65  | M      | Chinese | t(8;21)   | C4         | 35  | M      | Chinese |
| S5      | 40  | F      | Malay   | t(8;21)   | C5         | 56  | F      | Chinese |
| S6      | 21  | F      | Malay   | Tri-21    | C6         | 33  | M      | Chinese |
| S7      | 22  | F      | Chinese | Normal    | C7         | 55  | F      | Chinese |
| S8      | 25  | F      | Malay   | inv(16)   | C8         | 49  | M      | Chinese |
| S9      | 52  | M      | Malay   | Normal    | C19        | 44  | M      | Chinese |
| S10     | 22  | M      | Chinese | Normal    | C10        | 30  | M      | Chinese |
| S11     | 21  | M      | Chinese | inv(16)   | C11        | 50  | F      | Chinese |
| S12     | 58  | M      | Chinese | Normal    | C12        | 45  | F      | Chinese |
| S13     | 42  | M      | Malay   | Normal    | C13        | 50  | F      | Chinese |
| S14     | 24  | F      | Chinese | Normal    | C14        | 47  | F      | Chinese |
| S15     | 34  | M      | Malay   | t(8;21)   | C15        | 32  | M      | Malay   |
| S16     | 47  | F      | Malay   | Normal    | C16        | 27  | M      | Chinese |
| S17     | 38  | M      | Malay   | Normal    | C17        | 58  | M      | Malay   |
| S18     | 20  | M      | Malay   | t(15;17)  | C18        | 62  | F      | Chinese |
| S19     | 26  | M      | Malay   | Normal    | C19        | 42  | F      | Chinese |

Blue header= AML cases (n=19, S1-S19); Green header= Healthy Controls (n=19, C1-C19).

**Table S2: Information of the analytes.**

| Proteins         | Gene Name | Ensembl         | Category              | Description                                             |
|------------------|-----------|-----------------|-----------------------|---------------------------------------------------------|
| <b>AFP</b>       | AFP       | ENSG00000081051 | Serum protein         | Alpha Fetoprotein                                       |
| <b>Total PSA</b> | KLK3      | ENSG00000142515 | Protease              | Kallikrein Related Peptidase 3                          |
| <b>CA 15.3</b>   | MUC1      | ENSG00000185499 | Cell surface molecule | Carbohydrate antigen 15-3 (Mucin 1)                     |
| <b>CA 19.9</b>   | FUT3      | ENSG00000171124 | Cell surface molecule | Carbohydrate antigen 19-9                               |
| <b>MIF</b>       | MIF       | ENSG00000240972 | Signaling molecules   | Macrophage Migration Inhibitory Factor                  |
| <b>TRAIL</b>     | TNFSF10   | ENSG00000121858 | Signaling molecules   | Tumor Necrosis Factor-related apoptosis-inducing ligand |
| <b>Leptin</b>    | LEP       | ENSG00000174697 | Hormone               | Satiety hormone                                         |
| <b>IL6</b>       | IL6       | ENSG00000136244 | Cytokine              | Interleukin 6                                           |
| <b>sFasL</b>     | FASLG     | ENSG00000117560 | Signaling molecules   | Fas Ligand                                              |

|                    |         |                 |                       |                                                           |
|--------------------|---------|-----------------|-----------------------|-----------------------------------------------------------|
| <b>CEA</b>         | CEACAM5 | ENSG00000105388 | Cell surface molecule | Carcinoembryonic Antigen-Related Cell Adhesion Molecule 5 |
| <b>CA125</b>       | MUC16   | ENSG00000181143 | Cell surface molecule | Mucin 16                                                  |
| <b>IL8</b>         | IL8     | ENSG00000169429 | Chemokine             | Interleukin 8                                             |
| <b>HGF</b>         | HGF     | ENSG00000019991 | Hormone               | Hepatocyte Growth Factor                                  |
| <b>sFas</b>        | FAS     | ENSG00000026103 | Signaling molecules   | Soluble Fas, Cell Surface Death Receptor                  |
| <b>TNFa</b>        | TNF     | ENSG00000232810 | Cytokine              | Tumor Necrosis Factor                                     |
| <b>Prolactin</b>   | PRL     | ENSG00000172179 | Hormone               | Pituitary hormone                                         |
| <b>SCF</b>         | KITLG   | ENSG00000049130 | Growth factor         | Stem Cell Factor                                          |
| <b>CYFRA21.1</b>   | KRT19   | ENSG00000171345 | Cytokeratin           | Keratin 19                                                |
| <b>OPN</b>         | SPP1    | ENSG00000118785 | Integrin              | Secreted Phosphoprotein 1                                 |
| <b>FGF2</b>        | FGF2    | ENSG00000138685 | Cytokine              | Fibroblast Growth Factor 2                                |
| <b>bHCG</b>        | CGB     | ENSG00000104827 | Hormone               | Chorionic Gonadotropin hormone                            |
| <b>HE4</b>         | WFDC2   | ENSG00000101443 | Protease inhibitor    | WAP Four-Disulfide Core Domain 2                          |
| <b>TGFa</b>        | TGFA    | ENSG00000163235 | Cytokine              | Transforming Growth Factor Alpha                          |
| <b>VEGF</b>        | VEGFA   | ENSG00000112715 | Growth factor         | Vascular Endothelial Growth Factor A                      |
| <b>Galectin</b>    | LGALS3  | ENSG00000131981 | Integrin              | Galactose-Specific Lectin 3                               |
| <b>Cathepsin D</b> | CTSD    | ENSG00000117984 | Protease              | Lysosomal Aspartyl Protease                               |
| <b>FAPa</b>        | FAP     | ENSG00000078098 | Integrin              | Fibroblast Activation Protein Alpha                       |
| <b>MIA</b>         | MIA     | ENSG00000261857 | Growth factor         | Melanoma Inhibitory Activity                              |
| <b>MPO</b>         | MPO     | ENSG00000005381 | Serum protein         | Myeloperoxidase                                           |
| <b>SHBG</b>        | SHBG    | ENSG00000129214 | Serum protein         | Sex Hormone Binding Globulin                              |
| <b>IGFBP3</b>      | IGFBP3  | ENSG00000146674 | Serum protein         | Insulin-Like Growth Factor Binding Protein 3              |
| <b>Ferritin</b>    | FTH1    | ENSG00000167996 | Serum protein         | Ferritin Heavy Chain 1                                    |

Red= Reported-Analytes. Olive-Green= Novel-Analytes.

**Table S3: Expression levels in healthy controls and comparison with the literature.**

| Analytes         | N    | Gender       | Age   | Ethnicity   | Median | Range       | Method    | Reference | Bioplex-Median | Bioplex-SD | Bioplex-Range | Unit  |
|------------------|------|--------------|-------|-------------|--------|-------------|-----------|-----------|----------------|------------|---------------|-------|
| <b>AFP</b>       | 270  |              | 40.7  | American    | 3040   | 500-11600   | RIA       | 4         | 1276           | 791.07     | 848.1-3380    | pg/ml |
|                  | 284  | M=173, F=111 | 20-64 | Danish      | 2600   | 600-12600   | ELISA     | 5         |                |            |               |       |
|                  | 49   | M=25, F=24   | 18-60 | Turkish     | 2138   | 736-4164    | ELISA     | 6         |                |            |               |       |
| <b>Total PSA</b> | 3222 | M=3222, F=0  | 40-79 | Canadian    | 1000   | 700-1900    | Hybritech | 7         | 972.1          | 447.71     | 327.3-2022    | pg/ml |
|                  | 8422 | M=8422, F=0  | 40-79 | Chinese     | 3705   | 2150-5370   | Hybritech | 8         |                |            |               |       |
|                  | 5805 | M=5805, F=0  | 30-79 | Korean      | 3650   | 2000-6300   | Hybritech | 9         |                |            |               |       |
|                  | 5133 | M=513, F=0   | 20-79 | Singaporean | 3716   | 1400-6600   | ELISA     | 10        |                |            |               |       |
|                  | 5833 | M=583, F=0   | 20-89 | Indian      | 1625   | 800-2200    | ELISA     | 11        |                |            |               |       |
|                  | 2866 | M=286, F=0   | 40-79 | Japanis     | 3500   | 2000-5000   | ELISA     | 12        |                |            |               |       |
|                  | 3233 | M=0, F=323   | 20-62 | Norwegian   | 10.9   | 5-35        | IRMA      | 13        |                |            |               |       |
| <b>CA 15-3</b>   | 323  | M=0, F=323   | 20-62 | Norwegian   | 10.9   | 5-35        | IRMA      | 13        | 7.72           | 4.6        | 4.29-17.67    | U/ml  |
| <b>CA 19-9</b>   | 49   | M=25, F=24   | 18-60 | Turkish     | 5.098  | 1.90–12.253 | ELISA     | 6         | 12.13          | 5.32       | 7.19-20.57    | U/ml  |
| <b>MIF</b>       | 53   | M=9, F=44    | 20-40 | Turkish     | 4971.2 | 1917-8025   | ELISA     | 14        | 1706           | 664.44     | 533.9-2861    | pg/ml |

|               |     |             |          |          |        |              |           |    |       |          |             |       |
|---------------|-----|-------------|----------|----------|--------|--------------|-----------|----|-------|----------|-------------|-------|
| <b>TRAIL</b>  | 25  | M=0,F=25    | 21-48    | Egypt    | 468.93 | 383-554      | ELISA     | 15 | 173.7 | 35.09    | 93.14-238.9 | pg/ml |
|               | 60  | M=47,F=13   | 40-75    | Italian  | 85     | 70-100       | ELISA     | 16 |       |          |             |       |
| <b>Leptin</b> | 713 | M=312,F=401 | 5.8-19.9 | German   | 2855   | 710-5000     | RIA       | 17 | 10100 | 12584.28 | 1150-36360  | pg/ml |
|               | 20  |             | 20-50    | Omanis   | 10600  | 6400-14800   | ELISA     | 18 |       |          |             |       |
| <b>IL-6</b>   | 22  | M=6,F=16    | 23-71    | American | 0.56   | 0-2.67       | Bioplex   | 19 | 24.05 | 50.66    | 23.35-111.4 | pg/ml |
|               | 20  | M=16,F=6    | 30-82    | German   | 1      | 0.5-1.5      | Multiplex | 20 |       |          |             |       |
|               | 14  | M=8,F=6     | 5.0-7.0  | Hispanic | 4.1    | 2.4-5.8      | Bioplex   | 21 |       |          |             |       |
|               | 26  |             |          |          | 4.3    | 0-72         | LabMAP    | 22 |       |          |             |       |
|               | 30  | M=14,F=16   | 20-40    | Turkish  | 4.6    | 4.3-4.9      | ELISA     | 23 |       |          |             |       |
|               | 23  | M=0,F=23    | 20-40    |          | 5      |              | Sandwich  | 24 |       |          |             |       |
|               | 50  | M=0,F=50    | 59       |          | 6.6    | 0.3-32.3     | LINCOpex  | 25 |       |          |             |       |
|               | 45  | M=0,F=45    | 36-76    |          | 8.8    | 0-64.1       | LabMAP    | 26 |       |          |             |       |
|               | 23  |             |          | Turkish  | 4.2    | 0-12.7       | ELISA     | 27 |       |          |             |       |
|               | 28  | M=20,F=8    | 50-70    |          | 20     | 1.3-339.3    | Luminex   | 28 |       |          |             |       |
|               | 378 |             |          |          | 22.8   | 0-2394.2     | Multiplex | 29 |       |          |             |       |
|               | 9   | M=5,F=4     | 19-55    |          | 31     | 20-40        | Multiplex | 30 |       |          |             |       |
|               | 44  | M=18,F=26   | 20-50    | Chinese  | 38.76  | 23.47-54.05  | ELISA     | 31 |       |          |             |       |
|               | 19  | M=11,F=8    | 24-57    | American | 32.63  | 19.28-118.63 | Multiplex | 32 |       |          |             |       |



|               |         |               |         |          |       |            |           |    |      |        |            |       |
|---------------|---------|---------------|---------|----------|-------|------------|-----------|----|------|--------|------------|-------|
| <b>sFasL</b>  | 10      |               |         | Polish   | 90    | 15-165     | ELISA     | 33 | 21.1 | 6.59   | 11.41-36.9 | pg/ml |
|               | 15      | M=12,<br>F=3  | 61      | Polish   | 326.7 | 151-870    | ELISA     | 34 |      |        |            |       |
| <b>CEA</b>    | 98      | M=98,<br>F=0  | 62      | Hungary  | 1900  | 1400-2500  | CMIA      | 35 | 1382 | 577.76 | 735.6-2829 | pg/ml |
|               | 49      | M=25,<br>F=24 | 18-60   | Turkey   | 1014  | 540-1693   | ELISA     | 6  |      |        |            |       |
| <b>CA 125</b> | 32<br>3 | M=0,<br>F=323 | 20-62   | Norway   | 10.9  | 5-35       | IRMA      | 13 | 5.98 | 1.24   | 5.08- 9.01 | U/ml  |
|               | 98      | M=98,<br>F=0  | 62      | Hungary  | 9.8   | 6.8-12.9   | CMIA      | 35 |      |        |            |       |
|               | 50      | M=0,<br>F=50  |         | Polish   | 9.94  | 5.06-36.60 | ELISA     | 36 |      |        |            |       |
| <b>IL-8</b>   | 22      | M=6,<br>F=16  | 23-71   | American | 0.13  | 0.05-0.18  | Bioplex   | 19 | 4.69 | 1.97   | 3.62-8.77  | pg/ml |
|               | 20      | M=16,<br>F=6  | 30-82   | German   | 0.5   | 0-5.6      | Multiplex | 20 |      |        |            |       |
|               | 30      | M=14,<br>F=16 | 20-40   | Turkish  | 5.3   |            | ELISA     | 23 |      |        |            |       |
|               | 23      | M=0,<br>F=23  | 20-40   |          | 5.7   |            | Sandwich  | 24 |      |        |            |       |
|               | 50      | M=0,<br>F=50  | 59      |          | 7.1   | 3.1-18.8   | LINCOpex  | 25 |      |        |            |       |
|               | 14      | M=8,<br>F=6   | 5.0-7.0 | Hispanic | 8.1   |            | Bioplex   | 21 |      |        |            |       |
|               | 28      | M=20,<br>F=8  | 50-70   |          | 8.1   | 3.9-15.3   | Luminex   | 28 |      |        |            |       |
|               | 26      |               |         |          | 9     | 3.3-18.8   | LabMAP    | 22 |      |        |            |       |
|               | 37<br>8 |               |         |          | 9.56  | 0-87.6     | Multiplex | 29 |      |        |            |       |
|               | 45      | M=0,<br>F=45  | 36-76   |          | 10.2  | 2.3-51.4   | LabMAP    | 26 |      |        |            |       |
|               | 44      | M=18,<br>F=0  | 20-50   | Chinese  | 30.55 |            | ELISA     | 31 |      |        |            |       |

|                  |         |               |         |          |       |             |           |    |       |             |             |       |  |  |
|------------------|---------|---------------|---------|----------|-------|-------------|-----------|----|-------|-------------|-------------|-------|--|--|
|                  |         | F=26          |         |          |       |             |           |    |       |             |             |       |  |  |
|                  | 23      |               |         | Turkish  | 12.9  | 0-50.4      | ELISA     | 27 |       |             |             |       |  |  |
|                  | 9       | M=5,<br>F=4   | 19-55   |          | 139   |             | Multiplex | 30 |       |             |             |       |  |  |
|                  | 19      | M=11,<br>F=8  | 24-57   | American | 10.94 | 3.94-52.10  | Multiplex | 32 |       |             |             |       |  |  |
|                  | 35      | M=9,F=26      | 21-86   | Italy    | 29.3  | 24.4-35.9   | Multiplex | 37 |       |             |             |       |  |  |
| <b>HGF</b>       | 35      | M=9,F=26      | 21-86   | Italy    | 319.7 | 196.6-477.9 | Multiplex | 37 | 176.4 | 47.19       | 156-319.6   | pg/ml |  |  |
|                  | 11      |               | 19-60   | American | 364.2 | 164-522.3   | Sandwich  | 38 |       |             |             |       |  |  |
| <b>sFas</b>      | 15      | M=12,<br>F=3  | 61      | Polish   | 227.3 | 135.3-319.3 | ELISA     | 34 | 1474  | 417.26      | 729.1-2439  | pg/ml |  |  |
|                  | 30      | M=15,<br>F=15 | 40-60   | German   | 6270  |             | ELISA     | 39 |       |             |             |       |  |  |
| <b>TNFa</b>      | 14      | M=8,<br>F=6   | 5.0-7.0 | Hispanic | 0.6   |             | Bioplex   | 21 | 5.55  | 2.04        | 3.45-9.61   | pg/ml |  |  |
|                  | 23      | M=0,<br>F=23  | 20-40   |          | 4     |             | Sandwich  | 24 |       |             |             |       |  |  |
|                  | 20      | M=16,<br>F=6  | 30-82   | German   | 5.8   | 0-115.8     | Multiplex | 20 |       |             |             |       |  |  |
|                  | 30      | M=14,<br>F=16 | 20-40   | Turkish  | 6.4   |             | ELISA     | 23 |       |             |             |       |  |  |
|                  | 28      | M=20,<br>F=8  | 50-70   |          | 8.4   | 1.7-62.6    | Luminex   | 28 |       |             |             |       |  |  |
|                  | 44      | M=18,<br>F=26 | 20-50   | Chinese  | 21.08 |             | ELISA     | 31 |       |             |             |       |  |  |
|                  | 27<br>8 |               |         |          | 34.32 | 0-3847.6    | Multiplex | 30 |       |             |             |       |  |  |
|                  | 9       | M=5,<br>F=4   | 19-55   |          | 73    |             | Multiplex | 21 |       |             |             |       |  |  |
| <b>Prolactin</b> | 13<br>3 | M=133,<br>F=0 | 46-55   |          | 16900 | 15300-18700 | Multiplex | 40 | 23020 | 8288.7<br>9 | 10320-40600 | pg/ml |  |  |

|                        |         |               |       |          |              |                    |             |    |       |              |                 |       |
|------------------------|---------|---------------|-------|----------|--------------|--------------------|-------------|----|-------|--------------|-----------------|-------|
|                        | 19<br>5 | M=0,<br>F=195 | 25-30 | Italian  | 14000        |                    | Immunoassay | 41 |       |              |                 |       |
| <b>SCF</b>             | 62      | M=22,<br>F=40 | 41    | Japanis  | 939          |                    | ELISA       | 42 | 61.96 | 17.81        | 40.75-<br>97.74 | pg/ml |
|                        | 45      | M=19,<br>F=26 | 68    |          | 997.7        |                    | ELISA       | 43 |       |              |                 |       |
| <b>CYFR<br/>A 21-1</b> | 12<br>4 | M=71,<br>F=53 | 31-61 | Chinese  | 380          | 160-480            | RIA         | 44 |       |              |                 |       |
|                        | 98      | M=98,<br>F=0  | 62    | Hungary  | 1400         | 1200-2100          | CMIA        | 35 | 1546  | 466.48       | 1189-2233       | pg/ml |
|                        | 84      | M=74,<br>F=10 | 28-75 | Korean   | 1400         | 200-5700           | Immunoassay | 45 |       |              |                 |       |
| <b>OPN</b>             | 20      | M=10,<br>F=10 | 58    |          | 156700       |                    | ELISA       | 46 |       |              |                 |       |
|                        | 30      | M=16,<br>F=14 | 46-70 |          | 525500       | 131000-<br>1009000 | ELISA       | 47 | 32690 | 11050.<br>84 | 12540-<br>49080 | pg/ml |
| <b>FGF2</b>            | 26      |               |       |          | 43           | 0-521              | LabMAP      | 22 |       |              |                 |       |
|                        | 9       | M=5,<br>F=4   | 19-55 |          | 224          |                    | Multiplex   | 30 |       |              |                 |       |
|                        | 19      | M=11,<br>F=8  | 24-57 | American | 37.91        | 0.08-155.19        | Multiplex   | 32 | 138.5 | 49.56        | 103.9-<br>255.5 | pg/ml |
|                        | 35      | M=9,F=<br>26  | 21-86 | Italy    | 41.7         | 33.2-49.5          | Multiplex   | 37 |       |              |                 |       |
| <b>bHCG</b>            | 19<br>3 | M=193,<br>F=0 | 23-50 | Denish   | Not detected |                    | RIA         | 48 |       |              |                 |       |
| <b>HE4</b>             | 50      | M=0,<br>F=50  |       | Polish   | 44.15 pmol/L | 6.20-122.30        | ELISA       | 36 | 6720  | 5322.9<br>3  | 3525-<br>17950  | pg/ml |
|                        | 98      | M=98,<br>F=0  | 62    | Hungary  | 62.2 pmol/L  | 47.2-76.1          | CMIA        | 35 |       |              |                 |       |
| <b>TGFa</b>            | 74      |               | 21-58 | American | 147          |                    | RIA         | 49 |       |              |                 |       |
|                        | 44      |               |       | Spanish  | 6.2          | 0-14.5             | ELISA       | 50 | 7.47  | 4.96         | 5.54-16.54      | pg/ml |

|                    |         |                 |       |             |        |             |           |    |       |       |                 |       |
|--------------------|---------|-----------------|-------|-------------|--------|-------------|-----------|----|-------|-------|-----------------|-------|
| <b>VEGF</b>        | 50      | M=0,<br>F=50    |       | Polish      | 39.39  | 2.30-467.10 | ELISA     | 36 | 298.6 | 187.9 | 89.01-<br>592.1 | pg/ml |
|                    | 37<br>8 |                 |       |             | 76.6   | 0-1151      | Multiplex | 29 |       |       |                 |       |
|                    | 45      | M=0,<br>F=45    | 36-76 |             | 90.7   | 18-306      | LabMAP    | 26 |       |       |                 |       |
|                    | 23      | M=0,<br>F=23    | 20-40 |             | 99.7   |             | Sandwich  | 24 |       |       |                 |       |
|                    | 21      | M=5,<br>F=16    | 29-96 |             | 101    | 0-377       | ELISA     | 51 |       |       |                 |       |
|                    | 9       | M=5,<br>F=4     | 19-55 |             | 623    |             | Multiplex | 37 |       |       |                 |       |
|                    | 35      | M=9,F=<br>26    | 21-86 | Italy       | 61.6   | 32-118.9    | Multiplex | 32 |       |       |                 |       |
|                    | 19      | M=11,<br>F=8    | 24-57 | American    | 35.5   | 0.46-389.5  | Multiplex | 36 |       |       |                 |       |
| <b>Galectin-3</b>  | 46      | M=44,<br>F=2    | 46.1  | Chinese     | 3.63   |             | Multiplex | 52 |       |       |                 |       |
|                    | 20      |                 | 34.5  | German      | 3.7    |             | ELISA     | 53 |       |       |                 |       |
|                    | 20      | M=15,<br>F=5    | 58    | Netherlands | 9.7    |             | ELISA     | 54 |       |       |                 |       |
| <b>Cathepsin D</b> | 56      |                 |       | German      | 0.73   |             | ELISA     | 55 | 99.55 | 29.48 | 68.99-<br>182.6 | ng/ml |
|                    | 40<br>9 | M=245,<br>F=164 | 60.2  | Swedish     | 163 AU | 128-210 AU  | Multiplex | 56 |       |       |                 |       |
|                    | 11      | M=7,<br>F=4     | 55-70 | Spanish     | 0.73   | 0.53-1.41   | ELISA     | 57 |       |       |                 |       |
| <b>FAPa</b>        | 50<br>1 | M=183,<br>F=318 | 18-57 | Netherlands | 90.3   | 72.2-106.6  | ELISA     | 58 | 208.6 | 71.81 | 145.2-442       | ng/ml |
|                    | 30      | M=15,<br>F=15   | 18-72 | Netherlands | 107    | 67-157      | ELISA     | 59 |       |       |                 |       |
| <b>MIA</b>         | 5       | M=2,<br>F=3     | 24-66 | Brazil      | 5.64   | 4-8.6       | ELISA     | 60 | 27.31 | 8.45  | 18.41-<br>49.53 | ng/ml |

|                    |         |               |        |             |      |           |                                  |    |       |        |            |       |
|--------------------|---------|---------------|--------|-------------|------|-----------|----------------------------------|----|-------|--------|------------|-------|
|                    | 20      |               |        |             | 6.91 |           | ELISA                            | 61 |       |        |            |       |
| <b>MPO</b>         | 46      | M=30,<br>F=16 | 24-69  | Turkish     | 20   |           | ELISA                            | 62 | 21.8  | 15.37  | 8.26-69.07 | ng/ml |
|                    | 14<br>6 |               | 42-83  | New Zealand | 39   | 29-49     | ELISA                            | 63 |       |        |            |       |
| <b>SHBG</b>        | 19<br>3 | M=193,<br>F=0 | 23-50  | Denish      | 37   | 12-108    | RIA                              | 48 | 92.12 | 50.78  | 41.24-203  | nM    |
|                    | 25<br>0 | M=250,<br>F=0 | 25-100 |             | 45.5 | 35.5-65.9 | RIA                              | 64 |       |        |            |       |
| <b>IGFBP<br/>3</b> | 30      |               |        | Turkish     | 4235 | 2600-5950 | Immulite<br>2000                 | 65 | 1740  | 467.33 | 750.9-2569 | ng/ml |
|                    | 15      | M=0,<br>F=15  | 37.1   | Poland      | 4400 | 4100-4700 | RIA                              | 66 |       |        |            |       |
| <b>Ferritin</b>    | 16<br>7 | M=0,F=<br>167 |        | American    | 100  | 7-1182    | RIA                              | 67 | 499.5 | 249.81 | 131.1-1050 | ng/ml |
|                    | 33<br>1 | M=331,<br>F=0 |        | American    | 168  | 1-1479    | RIA                              | 67 |       |        |            |       |
|                    | 20      |               |        | Thailand    | 37   | 26-48     | Immunoturbi<br>dimetric<br>assay | 68 |       |        |            |       |

Orange header is the baseline analytes levels for healthy controls reported in peer-reviewed literature. Green header (right side shaded part) is the baseline analytes levels for healthy controls in this study.

**Table S4: Expression levels in AML cases and comparison with the literature.**

| Analytes             | N   | Gender        | Age   | Ethnicity | Median | Range          | Method   | Refer<br>ence | Bioplex-<br>Median | Bioplex-<br>SD | Bioplex-Range | Unit  |
|----------------------|-----|---------------|-------|-----------|--------|----------------|----------|---------------|--------------------|----------------|---------------|-------|
| <b>AFP</b>           | 1   |               |       |           | 2500   |                |          | 69            | 1294               | 1530.66        | 833.6-5697.0  | pg/ml |
| <b>Total<br/>PSA</b> |     |               |       |           |        |                |          |               | 500.3              | 267.55         | 61.21-856.70  | pg/ml |
| <b>CA 15.3*</b>      | 17  |               |       |           | 11.1   | 2-200          | ELISA    | 70            | 30.48              | 41.16          | 13.3-173.2    | U/ml  |
| <b>CA 19.9</b>       |     |               |       |           |        |                |          |               | 20.87              | 31.27          | 18.6-97.55    | U/ml  |
| <b>MIF*</b>          |     |               |       |           |        |                |          |               | 50220              | 32624.72       | 12460-111000  | pg/ml |
| <b>TRAIL*</b>        |     |               |       |           |        |                |          |               | 63.08              | 32.41          | 17.25-142.6   | pg/ml |
| <b>Leptin</b>        | 14  | M=6,<br>F=8   | 18-71 | Turkish   |        | 1376.1-60237.4 | ELISA    | 71            | 2481               | 4537.12        | 994.7-15320   | pg/ml |
| <b>IL6</b>           | 176 |               |       | American  | 36.11  |                | Bioplex  | 32            | 23.35              | 23.26          | 5.05-72.93    | pg/ml |
|                      |     |               |       |           | 6.7    | 0-194          |          | 72            |                    |                |               |       |
|                      | 32  |               | 25-56 | Egypt     | 24.83  | 0-64.23        | ELISA    | 73            |                    |                |               |       |
| <b>sFasL*</b>        | 16  |               |       |           | 600    | 200-1700       | ELISA    | 74            | 105.4              | 14.37          | 70.74-109.40  | pg/ml |
| <b>CEA</b>           | 17  |               |       |           |        | 0-7000         |          | 75            | 1235               | 604.6          | 647-2634      | pg/ml |
| <b>CA125</b>         | 20  | M=10,<br>F=10 | 34.8  |           | 12.4   |                | IMMULITE | 76            | 8.22               | 9.09           | 5.14-34.72    | U/ml  |
| <b>IL8*</b>          | 176 |               |       | American  | 170.83 |                | Bioplex  | 32            | 72.51              | 74             | 10.24-261.1   | pg/ml |

|                       |     |               |       |          |        |                 |         |    |       |          |              |       |
|-----------------------|-----|---------------|-------|----------|--------|-----------------|---------|----|-------|----------|--------------|-------|
|                       |     |               |       |          | 27.5   | 0-1587          |         | 72 |       |          |              |       |
| <b>HGF*</b>           | 59  |               |       |          | 843.5  | 101.9 - 12819.5 |         | 38 | 2968  | 5280.45  | 565.9-17560  | pg/ml |
|                       | 63  |               |       |          | 899.6  | 101.9-12819     |         | 77 |       |          |              |       |
| <b>sFas*</b>          | 16  |               |       |          | 11     | 8.5-14          | ELISA   | 74 | 3454  | 1204.89  | 1436-5576    | pg/ml |
| <b>TNFa*</b>          | 63  |               |       |          | 8.9    | 7.3-19          |         | 77 | 18.88 | 5.17     | 7.8-24.32    | pg/ml |
|                       |     |               |       |          | 5.7    | 1.3-42.8        |         | 78 |       |          |              |       |
|                       | 176 |               |       | American | 62.88  |                 | Bioplex | 32 |       |          |              |       |
| <b>Prolactin</b>      | 56  | M=24,<br>F=32 | 24-86 |          | 30000  |                 | MEIA    | 79 | 27110 | 13891.65 | 10520-57980  | pg/ml |
| <b>SCF</b>            | 13  |               |       |          | 1750   | 1000-2500       |         | 80 | 93.11 | 31.85    | 42.51-130.8  | pg/ml |
| <b>CYFRA2<br/>1.1</b> |     |               |       |          |        |                 |         |    | 2934  | 1371.05  | 1648-5939    | pg/ml |
| <b>OPN*</b>           | 68  |               |       |          | 745000 | 0-10780000      | ELISA   | 47 | 90770 | 86609.87 | 43750-373700 | pg/ml |
| <b>FGF2*</b>          | 176 |               |       | American | 32.19  |                 | Bioplex | 32 | 255.5 | 130.6    | 94-532.5     | pg/ml |
|                       |     |               |       |          | 2.8    | 1.4-14.3        |         | 81 |       |          |              |       |
|                       | 113 |               |       |          | 6.48   | 4.66-203.73     |         | 77 |       |          |              |       |
| <b>bHCG</b>           | 1   |               |       |          | 3      |                 |         | 69 | 2.08  | 0.54     | 1.28-3.02    | mU/ml |
| <b>HE4</b>            |     |               |       |          |        |                 |         |    | 17930 | 7103.42  | 3525-24390   | pg/ml |
| <b>TGFa</b>           | 49  |               |       |          | 0      | 0-199.4         |         | 77 | 46.83 | 39.34    | 20.1-158.2   | pg/ml |
| <b>VEGF</b>           | 115 |               |       |          | 30.43  | 21.47-439.25    |         | 77 | 449.8 | 170.61   | 218.9-759.3  | pg/ml |

|                     |     |  |       |          |         |                |         |    |       |        |             |       |
|---------------------|-----|--|-------|----------|---------|----------------|---------|----|-------|--------|-------------|-------|
|                     |     |  |       |          | 54.3    | 2.8-455.4      |         | 78 |       |        |             |       |
|                     | 176 |  |       | American | 53.43   |                | Bioplex | 32 |       |        |             |       |
| <b>Galectin-3*</b>  | 5   |  |       | American | 65      |                | ELISA   | 82 | 73.3  | 45.97  | 9.7-174.5   | ng/ml |
| <b>Cathepsin D*</b> |     |  |       |          |         |                |         |    | 317.1 | 314.91 | 179.8-1111  | ng/ml |
| <b>FAPa*</b>        |     |  |       |          |         |                |         |    | 92.42 | 69.71  | 41.6-306.1  | ng/ml |
| <b>MIA</b>          |     |  |       |          |         |                |         |    | 31.38 | 13.47  | 24.12-64.79 | ng/ml |
| <b>MPO*</b>         | 19  |  |       |          | 100     |                | ELISA   | 83 | 1239  | 508    | 297.7-2370  | ng/ml |
| <b>SHBG*</b>        |     |  |       |          |         |                |         |    | 27.94 | 19.86  | 7.04-58.99  | nM    |
| <b>IGFBP3</b>       | 11  |  | 28-80 |          | 3200    |                | ELISA   | 84 | 1597  | 597.7  | 498.3-2577  | ng/ml |
| <b>Ferritin*</b>    | 32  |  | 25-56 | Egypt    | 1400.25 | 617.25-1875.35 | ELISA   | 73 | 1966  | 496.08 | 1135-2647   | ng/ml |

Orange header is the baseline analytes levels for AML cases reported in peer-reviewed literature. Blue header (right side shaded part) is the baseline analytes levels for AML cases in this study. Olive-Green= Novel-Analytes: no published baseline found in AML. Statistically significant analytes are shown as asterisk (\*) (Mann-Whitney U-test, p-value <0.005).



**Table S5: Statistical tests for analytes in AML cases compared to healthy controls.**

| Analytes   | P-value*         | Power** | BI Score***     |
|------------|------------------|---------|-----------------|
| AFP        | 0.09033          | 0.8304  | 0.07723         |
| Total PSA  | 0.7703           | 0.0721  | 0.892257        |
| CA15-3     | <b>1.10E-08</b>  | 1       | 0.854866        |
| CA-19-9    | 0.8819           | 0.267   | 0.120152        |
| MIF        | <b>2.79E-09</b>  | 1       | <b>3.188746</b> |
| TRAIL      | <b>1.08E-09</b>  | 0.999   | <b>1.516339</b> |
| Leptin     | 0.01538          | 0.7065  | <b>1.715155</b> |
| IL-6       | 0.3812           | 0.6761  | 0.168804        |
| sFasL      | <b>5.59E-06</b>  | 1       | <b>4.002725</b> |
| CEA        | 0.6441           | 0.9754  | 1.076593        |
| CA-125     | 0.02848          | 0.9508  | 0.037218        |
| IL-8       | <b>1.33E-06</b>  | 1       | <b>2.450504</b> |
| HGF        | <b>2.37E-07</b>  | 1       | <b>2.25318</b>  |
| sFas       | <b>2.98E-06</b>  | 1       | <b>1.537448</b> |
| TNFa       | <b>7.37E-06</b>  | 1       | <b>2.426188</b> |
| Prolactin  | 0.2844           | 0.611   | 1.063814        |
| SCF        | 0.03176          | 0.8605  | <b>1.915231</b> |
| CYFRA-21-1 | 0.1594           | 0.234   | <b>2.123984</b> |
| OPN        | <b>2.08E-06</b>  | 1       | 1.283494        |
| FGF-2      | <b>0.001855</b>  | 0.9998  | <b>1.746355</b> |
| bHCG       | 0.2097           | 0.2422  | 1.080848        |
| HE4        | 0.01569          | 0.8984  | <b>2.067391</b> |
| TGFa       | 0.03596          | 0.9999  | <b>2.54859</b>  |
| VEGF       | 0.2437           | 0.3613  | 0.846097        |
| Galectin   | <b>1.73E-07</b>  | 1       | <b>2.679931</b> |
| Cathepsin  | <b>1.13E-10</b>  | 1       | <b>1.454599</b> |
| FAPa       | <b>0.0008892</b> | 0.8112  | <b>1.759841</b> |
| MIA        | 0.7038           | 0.126   | 1.149084        |
| MPO        | <b>2.37E-07</b>  | 1       | <b>4.016934</b> |
| SHBG       | <b>2.30E-05</b>  | 0.7126  | 1.054942        |
| IGFBP3     | 0.212            | 0.2379  | 1.084311        |
| Ferritin   | <b>1.13E-10</b>  | 1       | <b>2.285821</b> |

\*P-value was calculated by Mann-Whitney U-test. Highly significant p-values (<0.005) are shown as bold.

\*\*The probability of getting a significant p-value in 19 AML cases was calculated by power analysis. A power of 1 means 100% probability of getting a significant p-value despite the small sample size.

\*\*\* BI= 'Bimodality Index' was calculated by R. Analytes that follow bimodal distribution patterns are called informative for samples clustering (BI>1.4, shown as bold) <sup>1</sup>.

## References:

1. Wang J, Wen S, Symmans WF, Pusztai L, Coombes KR. The bimodality index: a criterion for discovering and ranking bimodal signatures from cancer gene expression profiling data. *Cancer informatics*. 2009;7:199.
2. Network CGAR. Genomic and epigenomic landscapes of adult de novo acute myeloid leukemia. *The New England journal of medicine*. 2013;368(22):2059.
3. Assenov Y, Müller F, Lutsik P, Walter J, Lengauer T, Bock C. Comprehensive analysis of DNA methylation data with RnBeads. *Nature methods*. 2014;11(11):1138-1140.
4. Ball D, Rose E, Alpert E. Alpha-fetoprotein levels in normal adults. *The American journal of the medical sciences*. 1992;303(3):157-159.
5. Christiansen M, Høgdall C, Andersen J, Nørgaard-Pedersen B. Alpha-fetoprotein in plasma and serum of healthy adults: preanalytical, analytical and biological sources of variation and construction of age-dependent reference intervals. *Scandinavian journal of clinical and laboratory investigation*. 2001;61(3):205-215.
6. Erden G, Barazi A, Tezcan G, Yildirimkaya M. Biological variation and reference change values of CA 19-9, CEA, AFP in serum of healthy individuals. *Scandinavian journal of clinical and laboratory investigation*. 2008;68(3):212-218.
7. Capitanio U, Perrotte P, Zini L, et al. Population-based analysis of normal total PSA and percentage of free/total PSA values: results from screening cohort. *Urology*. 2009;73(6):1323-1327.
8. Liu Z-Y, Sun Y-H, Xu C-L, Gao X, Zhang L-M, Ren S-C. Age-specific PSA reference ranges in Chinese men without prostate cancer. *Asian J Androl*. 2009;11(1):100-103.
9. Lee SE, Kwak C, Park MS, Lee CH, Kang W, Oh S-J. Ethnic differences in the age-related distribution of serum prostate-specific antigen values: a study in a healthy Korean male population. *Urology*. 2000;56(6):1007-1010.
10. Aw SS, Tar-Choon. Age-related reference intervals for free and total prostate-specific antigen in a Singaporean population. *Pathology*. 2000;32(4):245-249.
11. Malati T, Kumari GR. Racial and ethnic variation of PSA in global population: Age specific reference intervals for serum prostate specific antigen in healthy south Indian males. *Indian Journal of Clinical Biochemistry*. 2004;19(1):132-137.
12. Oesterling J, Kumamoto Y, Tsukamoto T, et al. Serum prostate-specific antigen in a community-based population of healthy Japanese men: lower values than for similarly aged white men. *British journal of urology*. 1995;75(3):347-353.
13. Zurawski VR, Orjaseter H, Andersen A, Jellum E. Elevated serum CA 125 levels prior to diagnosis of ovarian neoplasia: relevance for early detection of ovarian cancer. *International journal of cancer*. 1988;42(5):677-680.
14. Ayaz T, Sahin SB, Sahin OZ, Cure MC, Sumer F, Ilkkilic K. Serum macrophage migration inhibitory factor levels in Hashimoto's thyroiditis; a case control study. 2014.
15. Azab NA, Rady HM, Marzouk SA. Elevated serum TRAIL levels in scleroderma patients and its possible association with pulmonary involvement. *Clinical rheumatology*. 2012;31(9):1359-1364.
16. Secchiero P, Corallini F, Ceconi C, et al. Potential prognostic significance of decreased serum levels of TRAIL after acute myocardial infarction. *PloS one*. 2009;4(2):e4442.
17. Blum WF, Englaro P, Hanitsch S, et al. Plasma leptin levels in healthy children and adolescents: Dependence on body mass index, body fat mass, gender, pubertal stage, and testosterone 1. *The Journal of Clinical Endocrinology & Metabolism*. 1997;82(9):2904-2910.

18. Al Maskari MY, Alnaqdy AA. Correlation between serum leptin levels, body mass index and obesity in Omanis. *Sultan Qaboos University Medical Journal*. 2006;6(2):27.
19. Stabler T, Piette JC, Chevalier X, Marini-Portugal A, Kraus VB. Serum cytokine profiles in relapsing polychondritis suggest monocyte/macrophage activation. *Arthritis & Rheumatism*. 2004;50(11):3663-3667.
20. Hoffmann TK, Sonkoly E, Homey B, et al. Aberrant cytokine expression in serum of patients with adenoid cystic carcinoma and squamous cell carcinoma of the head and neck. *Head & neck*. 2007;29(5):472-478.
21. Finnerty CC, Herndon DN, Przkora R, et al. Cytokine expression profile over time in severely burned pediatric patients. *Shock*. 2006;26(1):13-19.
22. Zeh H, Winikoff S, Landsittel D, et al. Multianalyte profiling of serum cytokines for detection of pancreatic cancer. *Cancer Biomarkers*. 2005;1(6):259-269.
23. Refik M, Mehmet N, Durmaz R, Ersoy Y. Cytokine profile and nitric oxide levels in sera from patients with brucellosis. *Brazilian journal of medical and biological research*. 2004;37(11):1659-1663.
24. Kalu E, Sumar N, Giannopoulos T, et al. Cytokine profiles in serum and peritoneal fluid from infertile women with and without endometriosis. *Journal of Obstetrics and Gynaecology Research*. 2007;33(4):490-495.
25. Lambeck AJ, Crijns AP, Leffers N, et al. Serum cytokine profiling as a diagnostic and prognostic tool in ovarian cancer: a potential role for interleukin 7. *Clinical Cancer Research*. 2007;13(8):2385-2391.
26. Gorelik E, Landsittel DP, Marrangoni AM, et al. Multiplexed immunobead-based cytokine profiling for early detection of ovarian cancer. *Cancer Epidemiology Biomarkers & Prevention*. 2005;14(4):981-987.
27. Arican O, Aral M, Sasmaz S, Ciragil P. Serum levels of TNF- $\alpha$ , IFN- $\gamma$ , IL-6, IL-8, IL-12, IL-17, and IL-18 in patients with active psoriasis and correlation with disease severity. *Mediators of inflammation*. 2005;2005(5):273-279.
28. Hathaway B, Landsittel DP, Gooding W, et al. Multiplexed analysis of serum cytokines as biomarkers in squamous cell carcinoma of the head and neck patients. *The Laryngoscope*. 2005;115(3):522-527.
29. Yurkovetsky ZR, Kirkwood JM, Edington HD, et al. Multiplex analysis of serum cytokines in melanoma patients treated with interferon- $\alpha$ 2b. *Clinical Cancer Research*. 2007;13(8):2422-2428.
30. Stroncek D, Slezak S, Khuu H, et al. Proteomic signature of myeloproliferation and neutrophilia: analysis of serum and plasma from healthy subjects given granulocyte colony-stimulating factor. *Experimental hematology*. 2005;33(10):1109-1117.
31. SARS BGoNRPf. Dynamic changes in blood cytokine levels as clinical indicators in severe acute respiratory syndrome. *Chinese medical journal*. 2003;116(9):1283.
32. Kornblau SM, McCue D, Singh N, Chen W, Estrov Z, Coombes KR. Recurrent expression signatures of cytokines and chemokines are present and are independently prognostic in acute myelogenous leukemia and myelodysplasia. *Blood*. 2010;116(20):4251-4261.
33. Kolomecki K, Maciaszczyk P, Stepień H, Stepień T, Kuzdak K, Ulanska J. P53 concentration and soluble FasL (sFasL) serum level as indicators of apoptosis in patients with benign and malignant thyroid tumors. *Bratislavské lekárske listy*. 2005;106(10):297.
34. Naumnik W, Izycki T, Ossolinska M, Chyczewska E. Serum levels of sFas and sFasL during chemotherapy of lung cancer. *Exp Oncol*. 2007;29(2):132-136.
35. Nagy B, Bhattoa HP, Steiber Z, et al. Serum human epididymis protein 4 (HE4) as a tumor marker in men with lung cancer. *Clinical Chemistry and Laboratory Medicine (CCLM)*. 2014;52(11):1639-1648.

36. Ławicki S, Będkowska GE, Gacuta-Szumarska E, Szmitkowski M. The plasma concentration of VEGF, HE4 and CA125 as a new biomarkers panel in different stages and sub-types of epithelial ovarian tumors. *Journal of ovarian research*. 2013;6(1):1.
37. Kleiner G, Marcuzzi A, Zanin V, Monasta L, Zauli G. Cytokine levels in the serum of healthy subjects. *Mediators of inflammation*. 2013;2013.
38. Verstovsek S, Kantarjian H, Estey E, et al. Plasma hepatocyte growth factor is a prognostic factor in patients with acute myeloid leukemia but not in patients with myelodysplastic syndrome. *Leukemia*. 2001;15(8):1165-1170.
39. Ugurel S, Rappel G, Tilgen W, Reinhold U. Increased soluble CD95 (sFas/CD95) serum level correlates with poor prognosis in melanoma patients. *Clinical cancer research*. 2001;7(5):1282-1286.
40. Clendenen TV, Arslan AA, Lokshin AE, et al. Circulating prolactin levels and risk of epithelial ovarian cancer. *Cancer Causes & Control*. 2013;24(4):741-748.
41. Lippi G, De Vita F, Salvagno GL, Montagnana M, Targher G, Guidi GC. Serum prolactin in professional soccer players. *Biochimica Medica*. 2009;19(2):177-181.
42. Kitoh T, Ishikawa H, Ishii T, Nakagawa S. Elevated SCF levels in the serum of patients with chronic renal failure. *British journal of haematology*. 1998;102(5):1151-1156.
43. Leyhe T, Hoffmann N, Stransky E, Laske C. Increase of SCF plasma concentration during donepezil treatment of patients with early Alzheimer's disease. *International Journal of Neuropsychopharmacology*. 2009;12(10):1319-1326.
44. Lee JH. Clinical Usefulness of Serum CYFRA 21-1 in Patients with Colorectal Cancer. *Nuclear medicine and molecular imaging*. 2013;47(3):181-187.
45. So HJ, Hong SI, Lee JK, Chang YH, Kang SJ, Hong YJ. Comparison of the serum fibrin-fibrinogen degradation products with cytokeratin 19 fragment as biomarkers in patients with lung cancer. *Biomedical reports*. 2014;2(5):737-742.
46. Kadota J, Mizunoe S, Mito K, et al. High plasma concentrations of osteopontin in patients with interstitial pneumonia. *Respiratory medicine*. 2005;99(1):111-117.
47. Standal T, Hjorth-Hansen H, Rasmussen T, et al. Osteopontin is an adhesive factor for myeloma cells and is found in increased levels in plasma from patients with multiple myeloma. *haematologica*. 2004;89(2):174-182.
48. Petersen PM, Skakkebaek NE, Vistisen K, Rørth M, Giwercman A. Semen quality and reproductive hormones before orchiectomy in men with testicular cancer. *Journal of Clinical Oncology*. 1999;17(3):941-941.
49. Moskal TL, Huang S, Ellis LM, Fritsche H, Chakrabarty S. Serum levels of transforming growth factor alpha in gastrointestinal cancer patients. *Cancer Epidemiology Biomarkers & Prevention*. 1995;4(2):127-131.
50. Lemos-Gonzalez Y, Rodriguez-Berrocal F, Cordero O, Gomez C, de la Cadena MP. Alteration of the serum levels of the epidermal growth factor receptor and its ligands in patients with non-small cell lung cancer and head and neck carcinoma. *British journal of cancer*. 2007;96(10):1569-1578.
51. Distler O, Del Rosso A, Giacomelli R, et al. Angiogenic and angiostatic factors in systemic sclerosis: increased levels of vascular endothelial growth factor are a feature of the earliest disease stages and are associated with the absence of fingertip ulcers. *Arthritis Res*. 2002;4(6):R11.
52. Wu X-Y, Li S-N, Wen S-N, et al. Plasma galectin-3 predicts clinical outcomes after catheter ablation in persistent atrial fibrillation patients without structural heart disease. *Europace*. 2015;17(10):1541-1547.
53. Beiras-Fernandez A, Weis F, Rothkopf J, et al. Local expression of myocardial galectin-3 does not correlate with its serum levels in patients undergoing heart

transplantation. *Annals of transplantation: quarterly of the Polish Transplantation Society*. 2012;18:643-650.

54. Meijers WC, van der Velde AR, Ruifrok WP, et al. Renal handling of galectin-3 in the general population, chronic heart failure, and hemodialysis. *Journal of the American Heart Association*. 2014;3(5):e000962.

55. Westhoff U, Fox C, Otto F. Quantification of cathepsin D in plasma of patients with malignant melanoma. *Anticancer research*. 1997;18(5B):3785-3788.

56. Gonçalves I, Hultman K, Dunér P, et al. High levels of cathepsin D and cystatin B are associated with increased risk of coronary events. *Open heart*. 2016;3(1):e000353.

57. Barderas MG, Dardé VM, de la Cuesta F, et al. Proteomic analysis of circulating monocytes identifies cathepsin D as a potential novel plasma marker of acute coronary syndromes. *Clinical Medicine Insights Cardiology*. 2008;1:191.

58. de Willige SU, Malfliet JJ, Deckers JW, Dippel DW, Leebeek FW, Rijken DC. Plasma levels of soluble fibroblast activation protein in arterial thrombosis; determinants and cleavage of its substrate alpha-2-antiplasmin. *International journal of cardiology*. 2015;178:105-110.

59. Uitte de Willige S, Malfliet J, Janssen H, Leebeek F, Rijken D. Increased N-terminal cleavage of alpha-2-antiplasmin in patients with liver cirrhosis. *Journal of Thrombosis and Haemostasis*. 2013;11(11):2029-2036.

60. Odashiro M, Hans Filho G, Pereira PR, et al. Melanoma inhibitory activity in Brazilian patients with cutaneous melanoma. *Anais brasileiros de dermatologia*. 2015;90(3):327-332.

61. Vucetic B, Rogan SA, Hrabac P, et al. Biological value of melanoma inhibitory activity serum concentration in patients with primary skin melanoma. *Melanoma research*. 2008;18(3):201-207.

62. Kaya MG, Yalcin R, Okyay K, et al. Potential role of plasma myeloperoxidase level in predicting long-term outcome of acute myocardial infarction. *Texas Heart Institute Journal*. 2012;39(4):500.

63. Mocatta TJ, Pilbrow AP, Cameron VA, et al. Plasma concentrations of myeloperoxidase predict mortality after myocardial infarction. *Journal of the American College of Cardiology*. 2007;49(20):1993-2000.

64. Vermeulen A, Kaufman J, Giagulli V. Influence of some biological indexes on sex hormone-binding globulin and androgen levels in aging or obese males. *The Journal of Clinical Endocrinology & Metabolism*. 1996;81(5):1821-1826.

65. Tas F, Bilgin E, Tastekin D, Erturk K, Duranyildiz D. Serum IGF-1 and IGFBP-3 levels as clinical markers for patients with lung cancer. *Biomedical Reports*. 2016;4(5):609-614.

66. Milewicz T, Krzysiek J, Sztefko K, Radowicki S, Krzyczkowska-Sendrakowska M. 17 $\beta$ -estradiol regulation of human growth hormone (hGH), insulin-like growth factor-I (IGF-I) and insulin-like growth factor binding protein-3 (IGFBP-3) axis in hypoestrogenic, hypergonadotropic women. *Endokrynologia Polska*. 2005;56(6):876-882.

67. Bird CL, Witte JS, Swendseid ME, et al. Plasma Ferritin, Iron Intake, and the Risk of Colorectal Polyps. *American journal of epidemiology*. 1996;144(1):34-41.

68. Tripatara A, Srichana N, Lamool P, Amnuaykan S, Hongart P, Jetsrisuparb A. Relationship between Plasma Ferritin Level and Siderocyte Number in Splenectomized  $\beta$ -Thalassemia/HbE Patients. *Anemia*. 2012;2012.

69. Góes LSPd, Lopes RI, Campos OHA, Oliveira LCNd, Srougi M. Recurrence of acute myeloid leukemia in cryptorchid testis: case report. *Einstein (São Paulo)*. 2014;12(1):109-111.

70. Colomer R, Ruibal A, Genollk J, Salvador L. Circulating CA 15-3 antigen levels in non-mammary malignancies.
71. Yilmaz M, Kis C, Ceylan N, et al. Serum leptin level in acute myeloid leukemia patients. *Hematology*. 2008;13(1):21-23.
72. Hsu H-C, Lee Y-M, Tsai W-H, et al. Circulating levels of thrombopoietic and inflammatory cytokines in patients with acute myeloblastic leukemia and myelodysplastic syndrome. *Oncology*. 2002;63(1):64-69.
73. El Maksoud NA, Ragab HM, El Latif MMA, Abdalla S. Prognostic Impact of Elevated Serum Hyaluronic Acid, Ferritin and Interleukin-6 in Patients with Acute Myeloid Leukemia. *Journal of American Science*. 2010;6(10):532-541.
74. Bruserud Ø, Ulvestad E. Soluble Fas/Apo-1 (CD95) levels during T cell activation in the presence of acute myelogenous leukemia accessory cells; contributions from local release and variations in systemic levels. *Cancer Immunology, Immunotherapy*. 2000;49(7):377-387.
75. Hartozińska A, Noworolska A, Richter R. Nonspecific Cross-Reacting Antigen as a Marker of Myelocytic Leukemias in Individual Stages of Myelocytic Cell Differentiation. *Modern Trends in Human Leukemia VI New Results in Clinical and Biological Research Including Pediatric Oncology*: Springer; 1985:194-196.
76. Dilek I, Ayakta H, Demir C, Meral C, Ozturk M. CA 125 levels in patients with non-Hodgkin lymphoma and other hematologic malignancies. *Clinical & Laboratory Haematology*. 2005;27(1):51-55.
77. Aguayo A, Kantarjian H, Manshour T, et al. Angiogenesis in acute and chronic leukemias and myelodysplastic syndromes. *Blood*. 2000;96(6):2240-2245.
78. Gwang Kim J, Kyun Sohn S, Hwan Kim D, et al. Clinical implications of angiogenic factors in patients with acute or chronic leukemia: hepatocyte growth factor levels have prognostic impact, especially in patients with acute myeloid leukemia. *Leukemia & Lymphoma*. 2005;46(6):885-891.
79. Gado K, Rimanoczi E, Hasitz A, et al. Elevated levels of serum prolactin in patients with advanced multiple myeloma. *Neuroimmunomodulation*. 2002;9(4):231-236.
80. Foss B. Serum levels of thrombopoietin and stem cell factor in acute leukemia patients with chemotherapy-induced cytopenia and complicating infections. *Platelets*. 1999;10(1):17-23.
81. Glenjen N, Mosevoll KA, Bruserud Ø. Serum levels of angiogenin, basic fibroblast growth factor and endostatin in patients receiving intensive chemotherapy for acute myelogenous leukemia. *International journal of cancer*. 2002;101(1):86-94.
82. Fei F, Abdel-Azim H, Lim M, et al. Galectin-3 in pre-B acute lymphoblastic leukemia. *Leukemia*. 2013;27(12):2385.
83. Emmertsen F, Glenthøj A, Sønderskov J, Kampmann P, Sengeløv H, Borregaard N. ProHNPs are specific markers of normal myelopoiesis. 2014.
84. Wilson HP, Lesnikov V, Plymate S, Ward J, Deeg H. High IGFBP-3 levels in marrow plasma in early-stage MDS: effects on apoptosis and hemopoiesis. *Leukemia*. 2005;19(4):580-585.

## Supplemental Figures:

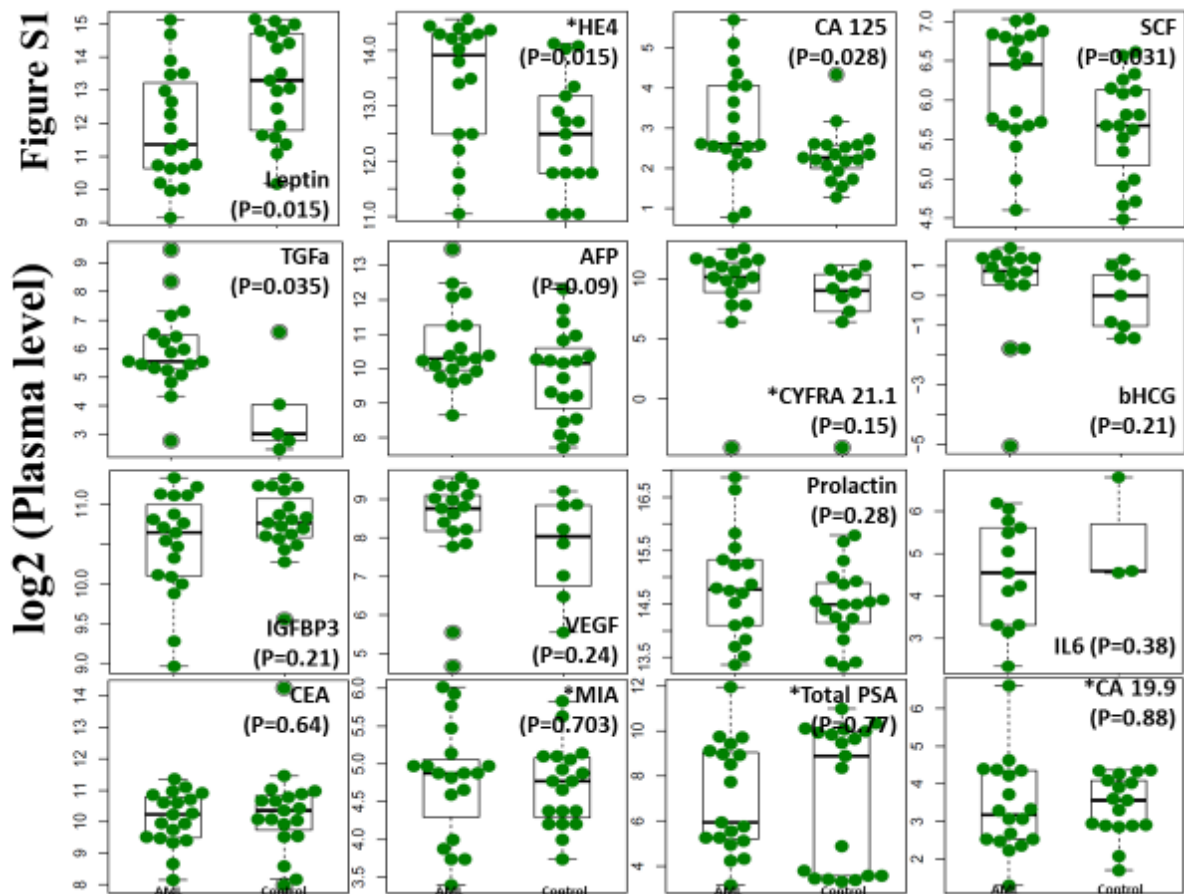

**Figure S1:**

### Beeswarm plots for analytes not differentially expressed in AML

P-value is not significant for these 16 analytes (Mann-Whitney U test). The AML cases and healthy controls are plotted side by side in each rectangle. Novel analytes are denoted by asterisk (\*). The y-axis measures plasma expression level (log<sub>2</sub> scale).

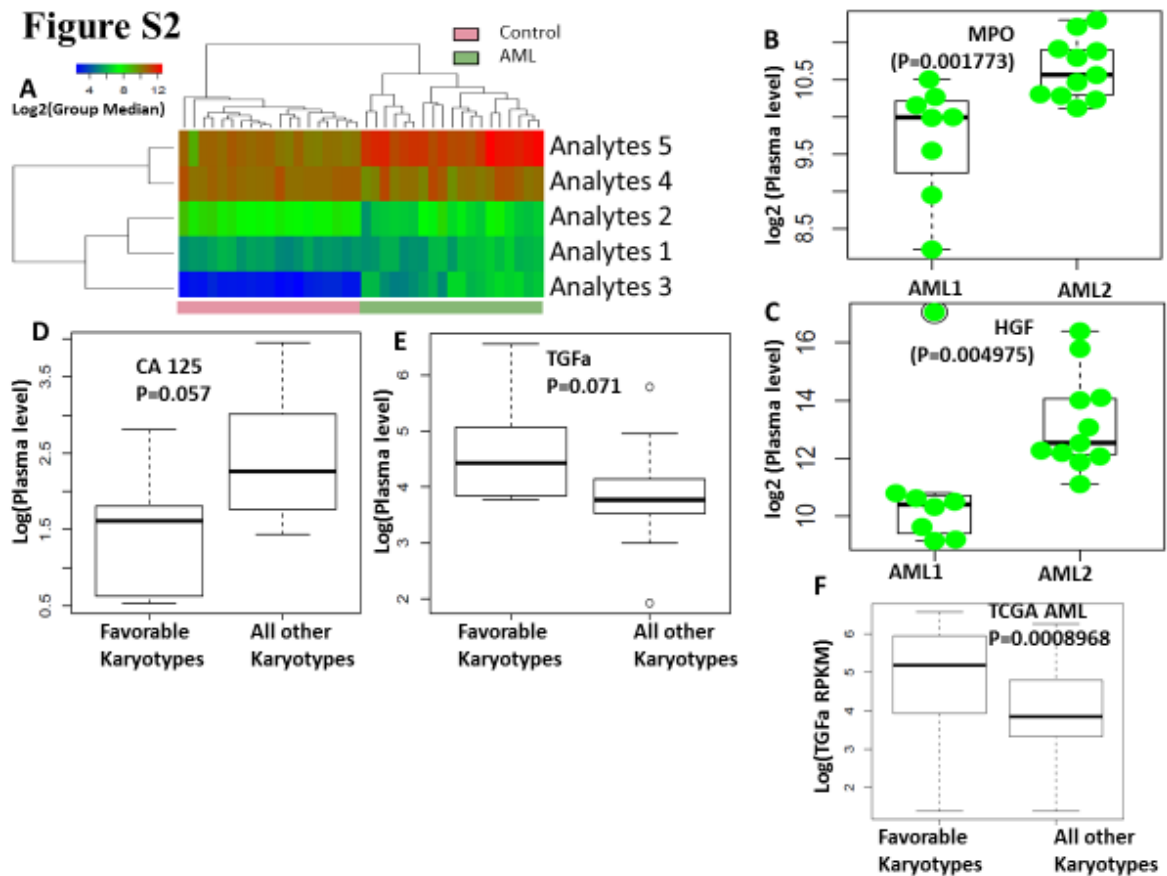

**Figure S2:**

**Expression levels across analyte and patient groups.**

(A) Aggregated median expression of the five analyte groups across all samples. Analytes4 and Analytes5, highly expressed groups, cluster together. The expression level of Analytes3 is higher in AML compared to control. (B and C) MPO and HGF expressions are significantly upregulated in the AML2 group (with 5 favorable karyotypes) compared to the AML1 group (defined in Figure 2D). (D and E) The CA-125 expression is relatively low among favorable karyotype AML patients, whereas TGfα expression is high within the favorable karyotype AML patients (although p-values are not significant based on Mann-Whitney U test). (F) TGfα mRNA expression is significantly high among favorable karyotype patients in TCGA cohort.



**Figure S3**

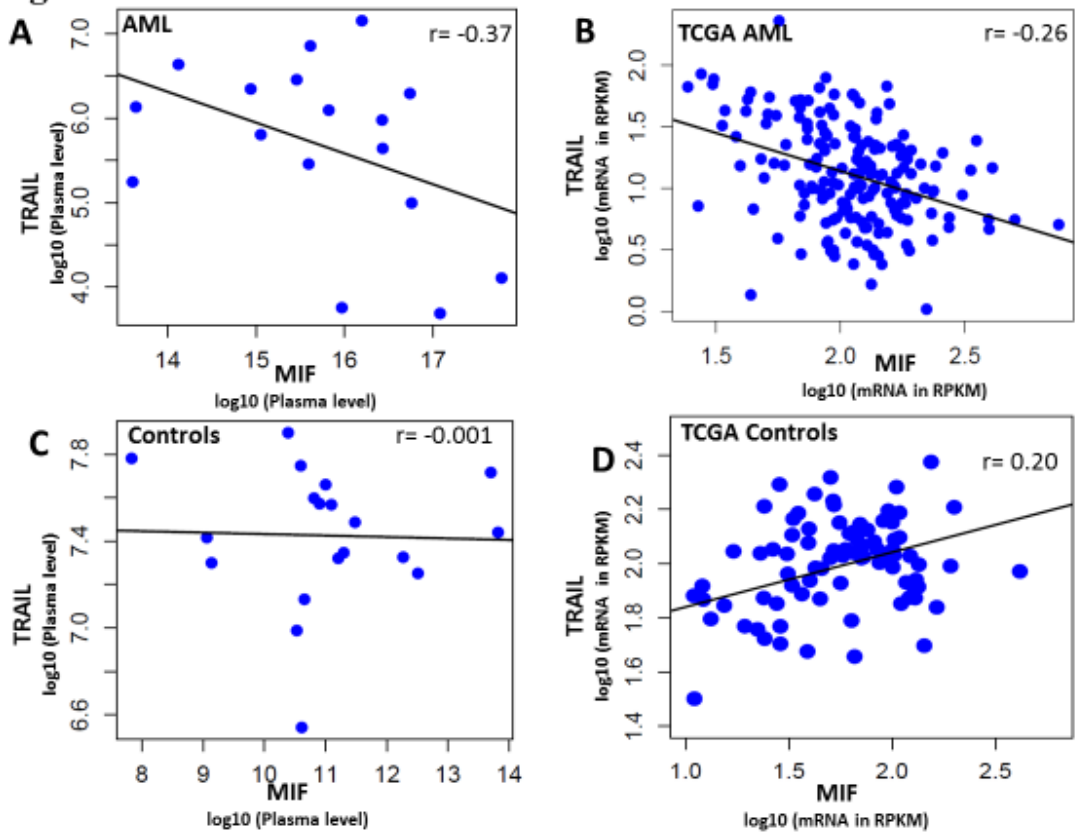

**Figure S3:**

**Correlation between MIF and TRAIL expression levels.**

Both MIF and TRAIL are found to be significantly deregulated and novel-analytes, as shown in Figure 1B. (A) MIF and TRAIL are negatively correlated in AML. (B) mRNA expression in TCGA cohort also shows a negative correlation between MIF and TRAIL, same as Figure S3A. (C) Almost no correlation is observed in controls in our study. (D) TCGA controls show opposite trends (positive correlation) compared to TCGA AML in Figure S3B. RPKM = reads per kilobase per million mapped reads.

**Figure S4**

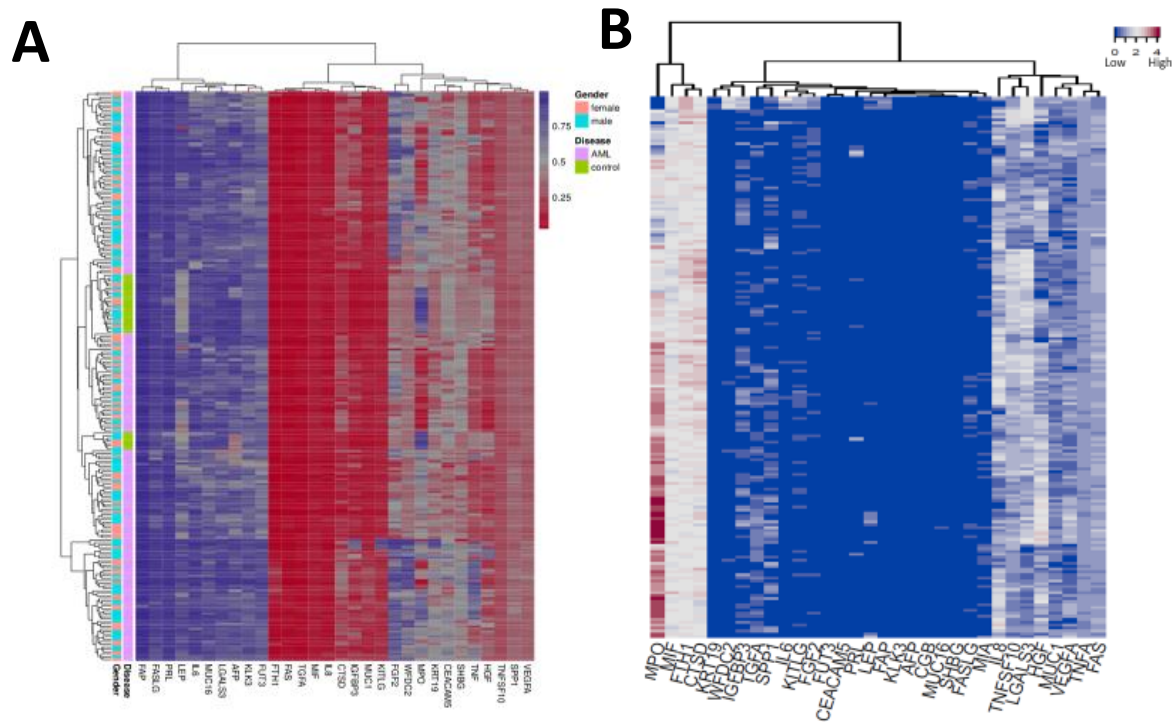

**Figure S4:**

**Methylation and gene expression levels of the studied analytes in TCGA.**

(A) Promoter methylation patterns for the 32 analytes in TCGA patients (194 AML and 30 controls). Unsupervised clustering identifies three groups of analytes: (1) the highly-methylated group contains 10 genes: FAP, FASLG, PRL, LEP, IL6, MUC16, LGALS3, AFP, KLK3, and FUT3; (2) the unmethylated group contains 9 genes: FTH1, FAS, TGFA, MIF, IL8, CTSD, IGFBP3, MUC1, and KITLG; (3) the partially methylated group consists of the remaining 13 genes. Interestingly, 7 out of the 9 unmethylated genes encoding analytes are significantly upregulated in our study (Figure 1B).

(B) Gene expression patterns for 32 analytes. Unsupervised clustering identifies three groups of genes, although the number of genes in each group is not the same as promoter methylation groups.
